# Supplementary material for: High-Level Production of Catechol from Glucose by Engineered Escherichia coli
Source: MDPI journal article supplement (doi:10.3390/fermentation8070344), 2022-07-21
Supplement: s1 [file s1]

## Supplementary materials

### High-level production of catechol from glucose by engineered *Escherichia coli*

Guotian Song<sup>1,2,3</sup>, Fengli Wu<sup>1,2</sup>, Yanfeng Peng<sup>1,2</sup>, Xiaolong Jiang<sup>1,2</sup> and Qinhong Wang<sup>1,2,\*</sup>

<sup>1</sup>CAS Key Laboratory of Systems Microbial Biotechnology, Tianjin Institute of Industrial Biotechnology, Chinese Academy of Sciences, Tianjin 300308, China; song\_gt@tib.cas.cn (G.S.); wu\_fl@tib.cas.cn (F.W.); peng\_yf@tib.cas.cn (Y.P.); jiang\_xl@tib.cas.cn (X.J.)

<sup>2</sup> National Center of Technology Innovation for Synthetic Biology, Tianjin 300308, China

<sup>3</sup>School of Life Science, University of Chinese Academy of Sciences, Beijing 100049, China

\* Correspondence should be addressed to Qinhong Wang

E-mail:wang\_qh@tib.cas.cn

Mailing address: Tianjin Institute of Industrial Biotechnology, Chinese Academy of Sciences,  
32 XiQiDao, Tianjin Airport Economic Area, Tianjin 300308, P. R. China

Phone: +86-022-84861950

## Supplementary Figures

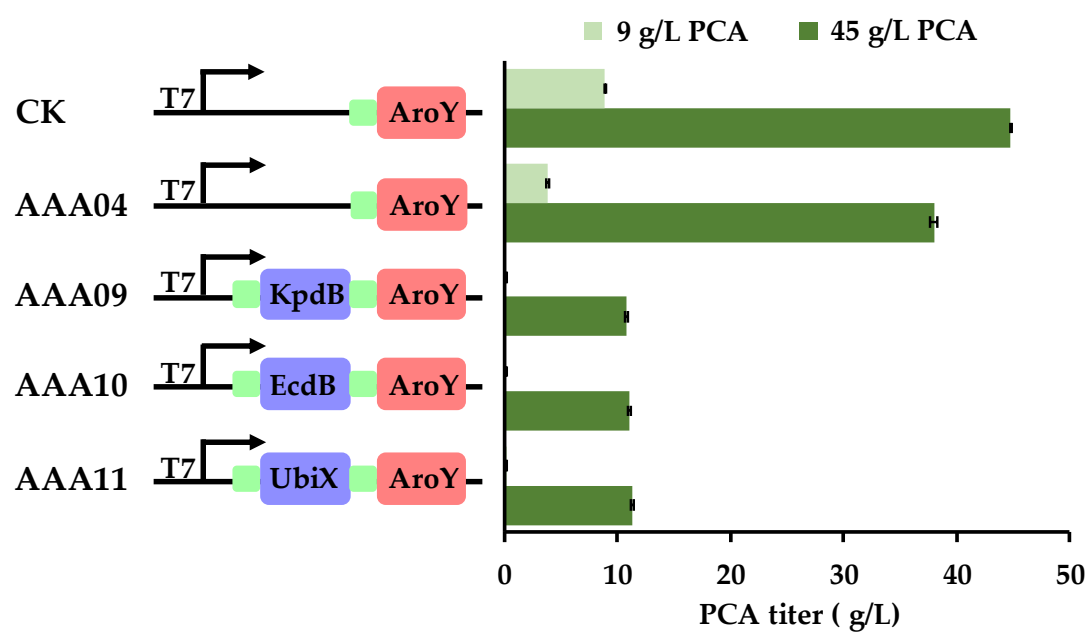

**Figure S1.** The residual PCA after producing catechol via two-step whole-cell biocatalysis. Data are the average mean of triplicate samples, and the error bars represent standard deviations.

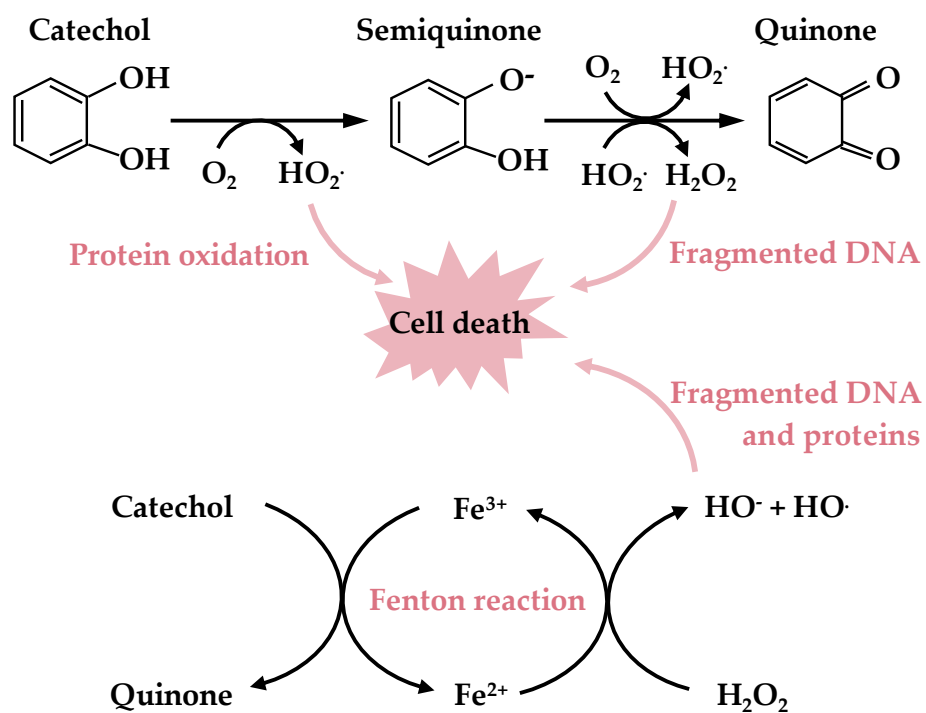

**Figure S2.** The mechanism of CA toxicity to microbial cells.
